# Supplementary material
Source: publisher figshare collection journal article supplement (https://plos.figshare.com/articles/dataset/_/129811)
Supplement: Supplementary file [file 1]

**Table S6:** Statistical significance for the evolutionary path analysis

| Domain                                                                | co-appearance | Stepwise appearance | Statistical significance |
|-----------------------------------------------------------------------|---------------|---------------------|--------------------------|
| <i>WW<sup>Class IV</sup> (phosphorylation near the motif)</i>         |               |                     |                          |
| Expected                                                              | 12            | 65                  | p=2e-7                   |
| Observed                                                              | 37            | 40                  |                          |
| <i>WW<sup>Class IV</sup> (phosphorylation within the motif)</i>       |               |                     |                          |
| Expected                                                              | 15            | 37                  | p=0.005                  |
| Observed                                                              | 28            | 24                  |                          |
| <i>SH2 (phosphorylation near the motif)</i>                           |               |                     |                          |
| Expected                                                              | 21            | 76                  | p=6.3e-6                 |
| Observed                                                              | 46            | 51                  |                          |
| <i>SH2 (phosphorylation within the motif)</i>                         |               |                     |                          |
| Expected                                                              | 8             | 19                  | <i>insignificant</i>     |
| Observed                                                              | 15            | 12                  |                          |
| <i>PDZ (phosphorylation near the motif)</i>                           |               |                     |                          |
| Expected                                                              | 6             | 31                  | p=0.0162                 |
| Observed                                                              | 16            | 21                  |                          |
| <i>PDZ (phosphorylation within the motif)</i>                         |               |                     |                          |
| Expected                                                              | 4             | 16                  | p=0.0062                 |
| Observed                                                              | 12            | 8                   |                          |
| <i>WW<sup>Class I/II/III</sup> (phosphorylation near the motif)</i>   |               |                     |                          |
| Expected                                                              | 5             | 21                  | <i>insignificant</i>     |
| Observed                                                              | 6             | 20                  |                          |
| <i>WW<sup>Class I/II/III</sup> (phosphorylation within the motif)</i> |               |                     |                          |
| Expected                                                              | 6             | 13                  | p=1.73e-5                |
| Observed                                                              | 15            | 4                   |                          |
| <i>SH3 (phosphorylation near the motif)</i>                           |               |                     |                          |
| Expected                                                              | 14            | 86                  | p=1.29e-5                |
| Observed                                                              | 38            | 62                  |                          |
| <i>SH3 (phosphorylation within the motif)</i>                         |               |                     |                          |
| Expected                                                              | 3             | 23                  | <i>insignificant</i>     |
| Observed                                                              | 7             | 19                  |                          |

The expected and observed counts of the two possible evolutionary paths were computed for all domain-motif types, either within or near the motif. The detailed procedure is presented in the Methods section in the main text. Statistical significance was computed using  $\chi^2$  test with Yates correction (results were corrected for multiple testing using Bonferroni correction).
