# Supplementary material
Source: publisher figshare collection journal article supplement (https://plos.figshare.com/articles/dataset/_/129811)
Supplement: Supplementary file [file 1]

**Table S3:** Proteins that are predicted to be involved in ‘double switches’ based on experimental protein-protein interaction data

| SH2 motifs | Class I WW                                                                                                                                                                                                                                                                                                                                                                   | SH3-1                                                                                                                                                                                                                                                                                                                                                                                                                                                                                                                                                                                                                                                                                                                                                                                                                                                                                                                                                                                                                                                                                                                                                                                                                                                                |
|------------|------------------------------------------------------------------------------------------------------------------------------------------------------------------------------------------------------------------------------------------------------------------------------------------------------------------------------------------------------------------------------|----------------------------------------------------------------------------------------------------------------------------------------------------------------------------------------------------------------------------------------------------------------------------------------------------------------------------------------------------------------------------------------------------------------------------------------------------------------------------------------------------------------------------------------------------------------------------------------------------------------------------------------------------------------------------------------------------------------------------------------------------------------------------------------------------------------------------------------------------------------------------------------------------------------------------------------------------------------------------------------------------------------------------------------------------------------------------------------------------------------------------------------------------------------------------------------------------------------------------------------------------------------------|
| Grb2       | CASL_HUMAN <ul style="list-style-type: none"> <li>• O75815 (SH2)</li> <li>• P16333 (SH2)</li> <li>• P07948 (SH2)</li> <li>• P46108 (SH2)</li> <li>• P46109 (SH2)</li> <li>• P06239 (SH2)</li> <li>• Q96J02 (WW)</li> </ul> JUN_HUMAN <ul style="list-style-type: none"> <li>• P40763 (SH2)</li> <li>• P42224 (SH2)</li> <li>• Q14765 (SH2)</li> <li>• Q13526 (WW)</li> </ul> | IRS2_HUMAN <ul style="list-style-type: none"> <li>• Q5T4P3 (SH2)</li> <li>• O15524 (SH2)</li> <li>• Q06124 (SH2)</li> <li>• P19174 (SH2, SH3-1)</li> </ul>                                                                                                                                                                                                                                                                                                                                                                                                                                                                                                                                                                                                                                                                                                                                                                                                                                                                                                                                                                                                                                                                                                           |
| Ptp2       | DAG1_HUMAN <ul style="list-style-type: none"> <li>• P06241 (SH2)</li> <li>• P62993 (SH2)</li> <li>• P16333 (SH2)</li> <li>• P12931 (SH2)</li> <li>• P27986 (SH2)</li> <li>• P11532 (WW)</li> <li>• P46939 (WW)</li> </ul>                                                                                                                                                    |                                                                                                                                                                                                                                                                                                                                                                                                                                                                                                                                                                                                                                                                                                                                                                                                                                                                                                                                                                                                                                                                                                                                                                                                                                                                      |
| Src        | EZRI_HUMAN <ul style="list-style-type: none"> <li>• P27986 (SH2)</li> <li>• P07332 (SH2)</li> <li>• P43405 (SH2)</li> <li>• P07332 (SH2)</li> <li>• P46940 (WW)</li> </ul>                                                                                                                                                                                                   | CD3E_HUMAN <ul style="list-style-type: none"> <li>• P43405 (SH2)</li> <li>• P43403 (SH2)</li> <li>• P27986 (SH2, SH3-2)</li> <li>• P16333 (SH2, SH3-1)</li> <li>• O43639 (SH2, SH3-1)</li> <li>• Q8TE68 (SH3-1)</li> <li>• Q8TE67 (SH3-1)</li> <li>• Q12929 (SH3-1)</li> <li>• Q9H6S3 (SH3-1)</li> </ul> HCLS1_HUMAN <ul style="list-style-type: none"> <li>• Q9H788 (SH2)</li> <li>• P62993 (SH2, SH3-1)</li> <li>• P090769 (SH2, SH3-1)</li> <li>• P07948 (SH2, SH3-1)</li> </ul> PTN6_HUMAN <ul style="list-style-type: none"> <li>• O60674 (SH2)</li> <li>• P43403 (SH2)</li> <li>• P51692 (SH2)</li> <li>• P43405 (SH2)</li> <li>• Q13094 (SH2)</li> <li>• Q8VV28 (SH2)</li> <li>• P27986 (SH2, SH3-2)</li> <li>• P62993 (SH2, SH3-1)</li> <li>• P07948 (SH2, SH3-1)</li> <li>• P15498 (SH2, SH3-1)</li> <li>• P06239 (SH2, SH3-1)</li> </ul> PTN11_HUMAN <ul style="list-style-type: none"> <li>• P40763 (SH2)</li> <li>• O60674 (SH2)</li> <li>• O14543 (SH2)</li> <li>• Q92835 (SH2)</li> <li>• P51692 (SH2)</li> <li>• P42229 (SH2)</li> <li>• Q14451 (SH2)</li> <li>• O00459 (SH2)</li> <li>• P27986 (SH2, SH3-2)</li> <li>• P46109 (SH2, SH3-1, SH3-2)</li> <li>• P62993 (SH2, SH3-1)</li> <li>• P16885 (SH2, SH3-1)</li> <li>• P56945 (SH3-1)</li> </ul> |

|       |                                                                                                                                                                                                                                                                                                                                                                                                                                                                                                                                                                      |                                                                                                                                                                                                                                                                                                                                                                                                                                                                                                                                                                                                                                                                                                                                                                                    |
|-------|----------------------------------------------------------------------------------------------------------------------------------------------------------------------------------------------------------------------------------------------------------------------------------------------------------------------------------------------------------------------------------------------------------------------------------------------------------------------------------------------------------------------------------------------------------------------|------------------------------------------------------------------------------------------------------------------------------------------------------------------------------------------------------------------------------------------------------------------------------------------------------------------------------------------------------------------------------------------------------------------------------------------------------------------------------------------------------------------------------------------------------------------------------------------------------------------------------------------------------------------------------------------------------------------------------------------------------------------------------------|
| Stat5 | <p>SYNPO_HUMAN</p> <ul style="list-style-type: none"> <li>• P62993 (SH2)</li> <li>• Q96QZ7 (WW)</li> </ul> <p>ERBB4_HUMAN</p> <ul style="list-style-type: none"> <li>• O43639 (SH2)</li> <li>• P42684 (SH2)</li> <li>• P20936 (SH2)</li> <li>• P46108 (SH2)</li> <li>• P46109 (SH2)</li> <li>• P62993 (SH2)</li> <li>• P16333 (SH2)</li> <li>• P00519 (SH2)</li> <li>• Q06124 (SH2)</li> <li>• P29353 (SH2)</li> <li>• P51692 (SH2)</li> <li>• P42229 (SH2)</li> <li>• P43405 (SH2)</li> <li>• O00459 (SH2)</li> <li>• P46937 (WW)</li> <li>• Q96J02 (WW)</li> </ul> | <p>OCLN_HUMAN</p> <ul style="list-style-type: none"> <li>• P07947 (SH2, SH3-1)</li> <li>• A2A3H9 (SH3-2)</li> <li>• Q07157 (SH3-2)</li> </ul> <p>LYN_HUMAN</p> <ul style="list-style-type: none"> <li>• P29350 (SH2)</li> <li>• O60674 (SH2)</li> <li>• Q92835 (SH2)</li> <li>• P29353 (SH2)</li> <li>• P43405 (SH2)</li> <li>• Q13094 (SH2)</li> <li>• P12931 (SH2, SH3-1)</li> <li>• P16885 (SH2, SH3-1)</li> <li>• P07948 (SH2, SH3-1)</li> <li>• P42680 (SH2, SH3-1)</li> <li>• P56945 (SH3-1)</li> <li>• A4D174 (SH3-1)</li> <li>• P14317 (SH3-1)</li> <li>• P78352 (SH3-1)</li> <li>• Q14511 (SH3-1)</li> <li>• Q15642 (SH3-1)</li> <li>• O75563 (SH3-1)</li> <li>• Q86WV1 (SH3-1)</li> </ul>                                                                                |
| Crk   | <p>WIPF2_HUMAN</p> <ul style="list-style-type: none"> <li>• O43639 (SH2)</li> <li>• Q9NZC7 (WW)</li> </ul>                                                                                                                                                                                                                                                                                                                                                                                                                                                           | <p>NCK1_HUMAN</p> <ul style="list-style-type: none"> <li>• O60674 (SH2)</li> <li>• O15524 (SH2)</li> <li>• O14512 (SH2)</li> <li>• P52757 (SH2)</li> <li>• Q13094 (SH2)</li> <li>• Q8WV28 (SH2)</li> <li>• P06241 (SH2, SH3-1)</li> <li>• P46108 (SH2, SH3-1, SH3-2)</li> <li>• P42684 (SH2, SH3-1)</li> <li>• P20936 (SH2, SH3-1)</li> <li>• P00519 (SH2, SH3-1)</li> <li>• O43281 (SH3-1)</li> <li>• Q14511 (SH3-1)</li> <li>• A7KAX9 (SH3-1)</li> <li>• Q9NZQ3 (SH3-1)</li> <li>• Q14185 (SH3-1)</li> <li>• P56945 (SH3-1)</li> <li>• Q9ULH1 (SH3-1)</li> <li>• Q8IZP0 (SH3-1)</li> <li>• O43150 (SH3-1)</li> <li>• Q8IZD9 (SH3-2)</li> <li>• Q9UPZ8 (SH3-2)</li> <li>• Q9UPX8 (SH3-2)</li> <li>• O94885 (SH3-2)</li> <li>• O15117 (SH3-2)</li> <li>• Q9BYB0 (SH3-2)</li> </ul> |

Table row titles list five different SH2 motifs: SH2<sup>Grb2</sup>, SH2<sup>Ptp2</sup>, SH2<sup>Src</sup>, SH2<sup>Stat5</sup> and SH2<sup>Crk</sup>. Table columns list Class I WW and SH3 motifs. Each table cell includes potential double switches: The proteins that include the two motifs are shown in capital letters of their Swissprot ID (these proteins originate in Table S2). Each of these motif-containing proteins is documented to interact with human proteins that include WW/SH2/SH3 domains (bullets; shown as Swissprot accessions). Domain content of the latter proteins is brought in parentheses. For instance, the first table entry details CASL\_HUMAN as having both SH2<sup>Grb2</sup> and Class I WW motifs. This protein is also documented as interacting with O75815 (that includes an SH2 domain) and with Q96J02 (that includes a WW domain). Domain assignment was done using Pfam definitions [1].

1. Finn RD, Mistry J, Tate J, Coggill P, Heger A, et al. (2010) The Pfam protein families database. Nucleic Acids Res 38: D211-222.
