# Supplementary material
Source: publisher figshare collection journal article supplement (https://plos.figshare.com/articles/dataset/_/129811)
Supplement: Supplementary file [file 1]

**Table S2:** Identification of human protein segments that display a dual motif that can act as a phosphorylation double switch for SH3 and SH2 domains or for SH2 and WW domains

|                |                                   | Strict scheme                                                                                                                           |                                                                                                                                                             | Less strict scheme                                                                                                                                                                                                                                                                 |                    |                                                                                                                                                                                                                                                                                                                                                                                 |
|----------------|-----------------------------------|-----------------------------------------------------------------------------------------------------------------------------------------|-------------------------------------------------------------------------------------------------------------------------------------------------------------|------------------------------------------------------------------------------------------------------------------------------------------------------------------------------------------------------------------------------------------------------------------------------------|--------------------|---------------------------------------------------------------------------------------------------------------------------------------------------------------------------------------------------------------------------------------------------------------------------------------------------------------------------------------------------------------------------------|
|                |                                   | Class I WW                                                                                                                              | SH3-1                                                                                                                                                       | SH3-2                                                                                                                                                                                                                                                                              | SH3-3              | SH3-4                                                                                                                                                                                                                                                                                                                                                                           |
|                |                                   | PPxY                                                                                                                                    | PxxDY                                                                                                                                                       | [RKY] xxPxxP                                                                                                                                                                                                                                                                       | PxxPx [KR]         | [PV] xxP                                                                                                                                                                                                                                                                                                                                                                        |
| SH2<br>(Grb2)  | YxNx                              | JUN_HUMAN(167-173)<br>CASL_HUMAN(109-115)<br>US6NL_HUMAN(629-635)                                                                       | IRS2_HUMAN(974-981)<br>JAG1_HUMAN(1135-1142)<br>GIT2_HUMAN(588-595)<br>LR37B_HUMAN(898-905)<br>RBM19_HUMAN(165-172)                                         | WASF3_HUMAN(337-343)<br>GCM2_HUMAN(359-365)                                                                                                                                                                                                                                        | NONE               | RET_HUMAN(1088-1093)<br>ROR1_HUMAN(784-789)                                                                                                                                                                                                                                                                                                                                     |
| SH2<br>(Ptp2)  | Y[IV]x[VILP]                      | DAG1_HUMAN(889-895)<br>LAP4A_HUMAN(207-213)<br>MIF_HUMAN(34-40)<br>K1462_HUMAN(337-343)                                                 | GEMI2_HUMAN(167-174)                                                                                                                                        | STA5B_HUMAN(668-674)<br>MYPT1_HUMAN(496-502)<br>LIPB2_HUMAN(835-841)<br>SCML2_HUMAN(506-512)<br>SND1_HUMAN(421-427)<br>MUTA_HUMAN(231-237)                                                                                                                                         | NONE               | DAG1_HUMAN(891-895)<br>RBM34_HUMAN(70-74)<br>PKP1_HUMAN(213-217)<br>RPGR1_HUMAN(928-932)<br>NDC80_HUMAN(457-461)<br>K1462(339-343)                                                                                                                                                                                                                                              |
| SH2<br>(Src)   | Y[QDEVAIL] [DENPYHI]<br>[IPVGAHS] | EZRI_HUMAN(475-481)<br>NTRK1_HUMAN(788-794)<br>LAP4A_HUMAN(227-233)<br>SCAM3_HUMAN(50-56)<br>DDR1_HUMAN(481-487)<br>CAN7_HUMAN(624-630) | PTN11_HUMAN(300-307)<br>CD3E_HUMAN(184-191)<br>HCLS1_HUMAN(374-381)<br>HCLS1_HUMAN(393-400)<br>PTN6_HUMAN(297-304)<br>GRK6_HUMAN(157-164)<br>MATR3(198-205) | GAB1_HUMAN(307-313)<br>B3AT_HUMAN(21-27)<br>3BP2_HUMAN(183-189)<br>MPDZ_HUMAN(717-723)<br>PKP4_HUMAN(478-484)<br>TRIP6_HUMAN(123-129)<br>PAR3_HUMAN(1321-1327)<br>MMP16_HUMAN(52-58)<br>CNO6L_HUMAN(10-16)<br>PHF10_HUMAN(196-202)<br>ABLM3_HUMAN(538-544)<br>CASS4_HUMAN(195-201) | ERG_HUMAN(258-264) | CD28_HUMAN(208-212)<br>EZRI_HUMAN(477-481)<br>P63_HUMAN(289-293)<br>GRWD1_HUMAN(32-36)<br>CING_HUMAN(1177-1181)<br>MTA2_HUMAN(482-486)<br>K1462_HUMAN(339-343)<br>SF3A1_HUMAN(455-459)<br>DSG2_HUMAN(967-971)<br>LAP4A_HUMAN(229-233)<br>RBM34_HUMAN(70-74)<br>WWC3_HUMAN(642-646)<br>BOP1_HUMAN(219-223)<br>RPGR1_HUMAN(928-932)<br>ACHG_HUMAN(511-515)<br>PKP1_HUMAN(213-217) |
| SH2<br>(Stat3) | YxxQ                              | LAP2_HUMAN(974-980)<br>SOX18_HUMAN(5-11)<br>PREX2_HUMAN(1555-1561)                                                                      | STAP2_HUMAN(318-325)<br>CC03_HUMAN(634-641)                                                                                                                 | NONE                                                                                                                                                                                                                                                                               | NONE               | ZO1_HUMAN(897-901)<br>CTND1_HUMAN(256-260)                                                                                                                                                                                                                                                                                                                                      |

|                |           |                                                                                                                                                                                                                                                                                                                                                                                              |                                                                                                                                                                                                                                                                                                                 |                                                                                                                                                                                                                                                                                                                                                                                                                                                                                                                                                                                                                                                                                                                                                                                                      |                                                                                                                        |                                                                                                                                                                                                                                                                                                                                                                                                                                                                                                                                                                                                                                                                      |
|----------------|-----------|----------------------------------------------------------------------------------------------------------------------------------------------------------------------------------------------------------------------------------------------------------------------------------------------------------------------------------------------------------------------------------------------|-----------------------------------------------------------------------------------------------------------------------------------------------------------------------------------------------------------------------------------------------------------------------------------------------------------------|------------------------------------------------------------------------------------------------------------------------------------------------------------------------------------------------------------------------------------------------------------------------------------------------------------------------------------------------------------------------------------------------------------------------------------------------------------------------------------------------------------------------------------------------------------------------------------------------------------------------------------------------------------------------------------------------------------------------------------------------------------------------------------------------------|------------------------------------------------------------------------------------------------------------------------|----------------------------------------------------------------------------------------------------------------------------------------------------------------------------------------------------------------------------------------------------------------------------------------------------------------------------------------------------------------------------------------------------------------------------------------------------------------------------------------------------------------------------------------------------------------------------------------------------------------------------------------------------------------------|
| SH2<br>(Stat5) | Y[VLTFIC] | <i>ERBB4_HUMAN</i> (1053-1057)<br><i>SH23A_HUMAN</i> (228-232)<br><i>EPOR_HUMAN</i> (501-505)<br><i>ERBB4_HUMAN</i> (1032-1036)<br><i>SYNPO_HUMAN</i> (562-566)<br><i>LAP4B_HUMAN</i> (364-368)<br><i>FUBP3_HUMAN</i> (540-544)<br><i>HGS_HUMAN</i> (234-238)<br><i>INP4B_HUMAN</i> (789-793)<br><i>NLGN1_HUMAN</i> (775-780)<br><i>RU2B_HUMAN</i> (148-152)<br><i>SG223_HUMAN</i> (156-160) | <i>ICK_HUMAN</i> (155-160)<br><i>OCLN_HUMAN</i> (311-316)<br><i>LYN_HUMAN</i> (488-493)<br><i>LAP2_HUMAN</i> (1100-1105)<br><i>MAK_HUMAN</i> (155-160)<br><i>PTK6_HUMAN</i> (110-115)<br><i>RAB1B_HUMAN</i> (3-8)<br><i>US6NL_HUMAN</i> (725-730)<br><i>CDKAL_HUMAN</i> (144-149)<br><i>FXRD2_HUMAN</i> (29-34) | <i>RPB1_HUMAN</i> (1838-1844)<br><i>CS021_HUMAN</i> (428-434)<br><i>KCNC3_HUMAN</i> (574-580)<br><i>SND1_HUMAN</i> (421-427)<br><i>MUTA_HUMAN</i> (231-237)<br><i>PDIP3_HUMAN</i> (236-242)<br><i>ETV6_HUMAN</i> (17-23)<br><i>SCML2_HUMAN</i> (506-512)<br><i>RRMJ1_HUMAN</i> (262-268)<br><i>MMP16_HUMAN</i> (52-58)<br><i>STA5B_HUMAN</i> (668-674)<br><i>LIPB2_HUMAN</i> (835-841)<br><i>PURA1_HUMAN</i> (384-390)<br><i>ROBO1_HUMAN</i> (1587-1593)<br><i>DCP1A_HUMAN</i> (310-316)<br><i>VIR_HUMAN</i> (217-223)<br><i>TEX10_HUMAN</i> (623-629)<br><i>MYPT1_HUMAN</i> (496-502)<br><i>SFRS9_HUMAN</i> (214-220)<br><i>ERRFI_HUMAN</i> (395-401)                                                                                                                                               | <i>IRS4_HUMAN</i> (699-704)<br><i>CC14C_HUMAN</i> (238-243)<br><i>SH3R1_HUMAN</i> (455-460)                            | <i>RPB1_HUMAN</i> (1901-1904)<br><i>HCK_HUMAN</i> (50-53)<br><i>DCC_HUMAN</i> (1362-1365)<br><i>INSR_HUMAN</i> (1010-1013)<br><i>GAB2_HUMAN</i> (475-478)<br><i>GRWD1_HUMAN</i> (32-35)<br><i>NUMB_HUMAN</i> (14-17)<br><i>ARAF_HUMAN</i> (23-26)<br><i>LAP4A_HUMAN</i> (229-232)<br><i>RBM34_HUMAN</i> (70-73)<br><i>WWC3_HUMAN</i> (642-645)<br><i>ABL2_HUMAN</i> (567-570)<br><i>K1462_HUMAN</i> (339-342)<br><i>NDC80_HUMAN</i> (457-460)<br><i>SFR2B_HUMAN</i> (43-46)<br><i>RPGR1_HUMAN</i> (928-931)<br><i>SYQ_HUMAN</i> (476-479)<br><i>CCDC6_HUMAN</i> (355-358)<br><i>ACHG_HUMAN</i> (511-514)<br><i>GSTP1_HUMAN</i> (7-10)<br><i>PKP1_HUMAN</i> (213-216) |
| SH2<br>(Crk)   | YxxP      | <i>PTN21_HUMAN</i> (566-572)<br><i>WIPF2_HUMAN</i> (252-258)<br><i>K1522_HUMAN</i> (675-681)                                                                                                                                                                                                                                                                                                 | <i>NCK1_HUMAN</i> (264-271)                                                                                                                                                                                                                                                                                     | <i>CDN1B_HUMAN</i> (88-94)<br><i>CBL_HUMAN</i> (774-780)<br><i>EMD_HUMAN</i> (19-25)<br><i>RAD51_HUMAN</i> (315-321)<br><i>BCAR1_HUMAN</i> (165-171)<br><i>ASPG_HUMAN</i> (178-184)<br><i>ACK1_HUMAN</i> (860-866)<br><i>3BP2_HUMAN</i> (183-189)<br><i>FGFR1_HUMAN</i> (463-469)<br><i>TAU_HUMAN</i> (514-520)<br><i>DOK1_HUMAN</i> (398-404)<br><i>WASF3_HUMAN</i> (248-254)<br><i>SH22A_HUMAN</i> (280-286)<br><i>DOK1_HUMAN</i> (377-383)<br><i>YAP1_HUMAN</i> (357-363)<br><i>TRIP6_HUMAN</i> (55-61)<br><i>NUAK2_HUMAN</i> (267-273)<br><i>CDN1B_HUMAN</i> (88-94)<br><i>MPDZ_HUMAN</i> (717-723)<br><i>ADA22_HUMAN</i> (880-886)<br><i>ZO1_HUMAN</i> (1435-1441)<br><i>WRIP1_HUMAN</i> (111-117)<br><i>ETV6_HUMAN</i> (17-23)<br><i>SCML2_HUMAN</i> (506-512)<br><i>RRMJ1_HUMAN</i> (262-268) | <i>CD28_HUMAN</i> (208-213)<br><i>RB_HUMAN</i> (786-793)<br><i>ERG_HUMAN</i> (258-263)<br><i>WIPF2_HUMAN</i> (251-258) | <i>FAK1_HUMAN</i> (718-723)<br><i>TTDN1_HUMAN</i> (11-16)<br><i>PKP1_HUMAN</i> (213-217)<br><i>RPGR1_HUMAN</i> (928-832)<br><i>K1462_HUMAN</i> (339-343)<br><i>WWC3_HUMAN</i> (642-646)                                                                                                                                                                                                                                                                                                                                                                                                                                                                              |

|  |  |  |  |                                                                                                                                                                                                                                                                                                                                                                                                                                                                                                                                                                                                                                                                                                                                                                                                                                                                                                                                                                                                                                                                                                                                 |  |  |
|--|--|--|--|---------------------------------------------------------------------------------------------------------------------------------------------------------------------------------------------------------------------------------------------------------------------------------------------------------------------------------------------------------------------------------------------------------------------------------------------------------------------------------------------------------------------------------------------------------------------------------------------------------------------------------------------------------------------------------------------------------------------------------------------------------------------------------------------------------------------------------------------------------------------------------------------------------------------------------------------------------------------------------------------------------------------------------------------------------------------------------------------------------------------------------|--|--|
|  |  |  |  | GCM2_HUMAN(359-365)<br>BIG3_HUMAN(1406-1412)<br>FGFR2_HUMAN(466-472)<br>FA21B_HUMAN(351-358)<br>LIPB2_HUMAN(835-841)<br>NRK_HUMAN(985-991)<br>DCP1A_HUMAN(310-316)<br>OTU7B_HUMAN(779-785)<br>PSB4_HUMAN(22-28)<br>BRD1_HUMAN(127-133)<br>PKP4_HUMAN(478-484)<br>SVIL_HUMAN(1317-1323)<br>PARD3_HUMAN(1321-1327)<br>PTN21_HUMAN(564-572)<br>PGAM4_HUMAN(119-125)<br>K1522_HUMAN(678-684)<br>CASS4_HUMAN(244-250)<br>KLF3_HUMAN(106-112)<br>RIF1_HUMAN(404-410)<br>CNO6L_HUMAN(10-16)<br>PK3CD_HUMAN(440-446)<br>PHF10_HUMAN(196-202)<br>LPHN3_HUMAN(170-176)<br>ERRFI_HUMAN(395-401)<br>SHB_HUMAN(297-303)<br>KS6A4_HUMAN(342-348)<br>CS021_HUMAN(428-434)<br>KCNC3_HUMAN(574-580)<br>SND1_HUMAN(421-427)<br>MUTA_HUMAN(231-237)<br>ZFHx4_HUMAN(2662-2668)<br>ATAD2_HUMAN(322-328)<br>TRIP6_HUMAN(123-129)<br>PDIP3_HUMAN(236-242)<br>TM1L2_HUMAN(200-206)<br>DOK4_HUMAN(255-261)<br>US6NL_HUMAN(804-810)<br>MMP16_HUMAN(52-58)<br>STA5B_HUMAN(668-674)<br>ATN1_HUMAN(729-735)<br>SFR19_HUMAN(238-244)<br>ABLM3_HUMAN(538-544)<br>RBM5_HUMAN(712-718)<br>HDAC3_HUMAN(404-410)<br>YTHD1_HUMAN(317-323)<br>TRPS1_HUMAN(1080-1086) |  |  |
|--|--|--|--|---------------------------------------------------------------------------------------------------------------------------------------------------------------------------------------------------------------------------------------------------------------------------------------------------------------------------------------------------------------------------------------------------------------------------------------------------------------------------------------------------------------------------------------------------------------------------------------------------------------------------------------------------------------------------------------------------------------------------------------------------------------------------------------------------------------------------------------------------------------------------------------------------------------------------------------------------------------------------------------------------------------------------------------------------------------------------------------------------------------------------------|--|--|

|                      |  |       |       |                                                                                                                                                                                                                                                                                                                                                                |      |        |
|----------------------|--|-------|-------|----------------------------------------------------------------------------------------------------------------------------------------------------------------------------------------------------------------------------------------------------------------------------------------------------------------------------------------------------------------|------|--------|
|                      |  |       |       | KI2S5_HUMAN(126-132)<br>PGAM1_HUMAN(119-125)<br>ROBO1_HUMAN(1587-1593)<br>CASS4_HUMAN(131-137)<br>VIR_HUMAN(217-223)<br>XRN1_HUMAN(1394-1400)<br>TEX10_HUMAN(623-629)<br>MYPT1_HUMAN(496-502)<br>DPYL1_HUMAN(504-510)<br>FAK1_HUMAN(441-447)<br>NDC1_HUMAN(469-475)<br>LSR_HUMAN(615-621)<br>SMS2_HUMAN(24-30)<br>SFRS9_HUMAN(214-220)<br>CASS4_HUMAN(195-201) |      |        |
| Total <sup>(*)</sup> |  | 31(7) | 26(5) | 126(23)                                                                                                                                                                                                                                                                                                                                                        | 8(2) | 53(10) |

Each table cell includes a protein segment that may bind SH2 and SH3 (or WW) domains. For example, the red-framed table entry details three protein segments (present in JUN, NEDD9 and USP6NL proteins) that obey the combined sequence pattern PPxYxNx (composed of the SH2<sup>Grb2</sup> YxNx pattern and the class I WW PPxY pattern – see Figure 3 in the main text for all dual sequence patterns). The third and fourth table columns detail the strict scheme analysis, and the three last columns detail the less-strict analysis results. Protein names (Swiss-Prot accessions or gene names) in *italic* font mean that the phosphorylation has highly reliable evidence.

(\*) Numbers in parenthesis indicate the count of dual sequence pattern hits that are phosphorylated according to our high reliability phosphorylation dataset.
